# Supplementary material for: Clinical characteristics, inflammation and coagulation status in patients with immunological disease-related chronic cerebrospinal venous insufficiency
Source: PubMed Central journal article supplement — Ann Transl Med. 2021 Feb;9(3):236. doi: 10.21037/atm-20-4201 (PMC7940939; doi:10.21037/atm-20-4201), 2021-02
Supplement: atm-09-03-236-supplementary.pdf [file atm-09-03-236-supplementary.pdf]

## Supplementary

**Table S1** Detailed information on coagulation and inflammatory kits and instruments

| Product name                                                                                                                     | Company name |
|----------------------------------------------------------------------------------------------------------------------------------|--------------|
| CRP (Human) ELISA Kit                                                                                                            | R&D Systems  |
| IL-6 ELISA                                                                                                                       | R&D Systems  |
| Human Enolase 2/Neuron-specific Enolase Quantikine ELISA Kit                                                                     | R&D Systems  |
| Antinuclear antibodies (ANAs), anti-neutrophil cytoplasmic antibodies (ANCAs), and antiphospholipid antibodies (APLAs) ELISA Kit | R&D Systems  |
| C3, C4 ELISA Kit                                                                                                                 | R&D Systems  |
| Human fibrinogen ELISA Kit                                                                                                       | R&D Systems  |
| REAADS Monoclonal Free Protein S                                                                                                 | REAADS       |
| REAADS Protein C Antigen                                                                                                         | REAADS       |
| Technozym <sup>®</sup> D-Dimer ELISA                                                                                             | Technozym    |
| Antithrombin-III ELISA Kit                                                                                                       | R&D Systems  |
